1

2 **Characterization of the gut DNA and RNA viromes in a cohort of Chinese residents and**  
3 **visiting Pakistanis**

4

5 Short title: Differences of gut virome between Chinese and visiting Pakistanis

6

7 Qiulong Yan<sup>1,2,†</sup>; Yu Wang<sup>1,3,†</sup>; Xiuli Chen<sup>1,†</sup>; Hao Jin<sup>4,5,†</sup>; Guangyang Wang<sup>2,†</sup>; Kuiqing Guan<sup>4</sup>;

8 Yue Zhang<sup>4</sup>; Pan Zhang<sup>6</sup>; Taj Ayaz<sup>2</sup>; Yanshan Liang<sup>1</sup>; Junyi Wang<sup>1</sup>; Guangyi Cui<sup>1</sup>; Yuanyuan Sun<sup>2</sup>;

9 Manchun Xiao<sup>2</sup>; Aiqin Zhang<sup>4</sup>; Peng Li<sup>4</sup>; Xueyang Liu<sup>2</sup>; Yufang Ma<sup>2,\*</sup>; Shenghui Li<sup>4,\*</sup>; Tonghui

10 Ma<sup>1,2,\*</sup>

11

12 1. School of Medicine, Nanjing University of Chinese Medicine, Nanjing 210029, China

13 2. College of Basic Medical Sciences, Dalian Medical University, Dalian 116044, China

14 3. Institute of Translational Medicine, Nanjing Medical University, Nanjing 210029, China

15 4. Shenzhen Puensum Genetech Institute, Shenzhen 518052, China

16 5. College of Food Science and Engineering, Inner Mongolia Agricultural University, Hohhot

17 010018, China

18 6. Department of Nephrology, Zhongshan Hospital, Fudan University, Shanghai 200032, China

19

20 \* Correspondence to: Tonghui Ma (matonghui@njucm.edu.cn), Shenghui Li (lsh2@qq.com), and

21 Yufang Ma (yufang\_ma@hotmail.com)

22

23 † These authors contributed equally to this work

24

25 **Abstract**

26 **Background:** Trillions of viruses inhabit the gastrointestinal tract. Some of them have been  
27 well-studied on their roles in infection and human health, but the majority remain unsurveyed. It  
28 has been established that the composition of the gut virome is highly variable based on the  
29 changes of diet, physical state, and environmental factors. However, the effect of host genetic  
30 factors, e.g. ethnic origin, on the gut virome is rarely investigated.

31 **Methods and Results:** Here, we characterized and compared the gut virome in a cohort of local  
32 Chinese residents and visiting Pakistani individuals, each group containing 24 healthy adults and 6  
33 children. Using metagenomic shotgun sequencing and assembly of fecal samples, a huge number  
34 of viral operational taxonomic units (vOTUs) were identified for profiling the DNA and RNA  
35 viromes. National background contributed a primary variation to individuals' gut virome.  
36 Compared with the Chinese adults, the Pakistan adults showed higher macrodiversity and different  
37 compositional and functional structures in their DNA virome and lower diversity and altered  
38 composition in their RNA virome. The virome variations of Pakistan children were inherited from  
39 the that of the adults but also tended to share similar characteristics with the Chinese cohort. We  
40 also analyzed and compared the bacterial microbiome between two cohorts and further revealed  
41 numerous connections between virus and bacterial host. Statistically, the gut DNA and RNA  
42 viromes were covariant to some extent ( $p < 0.001$ ), and they both influenced the holistic bacterial  
43 composition and vice versa.

44 **Conclusions:** This study provides an overview of gut viral community in Chinese and visiting  
45 Pakistanis and proposes a considerable role of ethnic origin in shaping the virome.

46 **Keywords:** virus-like particle, gut virome, viral community, RNA virus, metagenomic sequencing,

47 bacterial microbiome, nationality

48

49

## 50 **Background**

51 The human gut is a large reservoir of microorganisms, containing  $10^{11}$ - $10^{12}$  bacterial cells [1, 2],

52  $10^9$ - $10^{12}$  viral particles [3, 4], and small quantities of archaea and eukaryotes in per gram of feces

53 [5]. Benefiting from the development of high throughput sequencing techniques (e.g. amplicon or

54 whole-metagenomic sequencing), the gut bacterial community have been well studied over the

55 past years [6-8]. Gut bacteria was shown to exert profound effects on regulating host metabolism

56 [9, 10], and thereby had been linked to host health and diseases [11, 12]. However, as another part

57 of the gut microbial ecosystem, the holistic viral community of enteric microbiome (or “gut

58 virome”) was less well characterized [13]. Virus has a very flexible small genome ranging from a

59 few to several hundred kilobases [14], which corresponds to approximately 1% of the bacterial

60 genome (in average, 2-4 Mbp) [15, 16]. The gut virome was predominantly composed of two taxa

61 of bacteriophages, double-stranded DNA *Caudovirales* and single-stranded DNA *Microviridae*,

62 which constituted over 80% relative abundance of viral populations in human intestine [17]. The

63 *crAssphage* and *crAss-like* phages, a type of *Caudovirales* members that characteristically infect

64 *Bacteroides* spp., represented the highest abundance in healthy human gut [18, 19]. In addition to

65 bacteriophages, eukaryotic viruses, archaeal viruses, and RNA viruses were also important

66 components of gut virome [20, 21].

67

68 Due to the limitation of viral abundance in human gut, routine whole-metagenomic sequencing of  
69 fecal microbiome can produce only a small proportion of viral sequences for further analysis.  
70 Recently, virus-like particle (VLP) enrichment and subsequently metagenomic sequencing  
71 provided a prospective application for fully delineating the gut virome [22, 23]. Based on the VLP  
72 technique, studies had showed that the normal gut virome was partly inherited from mother [24,  
73 25], potentially transferred between twins [4], and continuously expanded during the first years of  
74 life [21]. In addition, longitudinal analysis revealed that the gut virome of healthy adults was  
75 highly diverse, temporally stable, and individually specific [14]. Disease-induced alterations of the  
76 gut virome had also be reported in multiple gastrointestinal and systemic disorders, including  
77 colorectal cancer [26, 27], inflammatory bowel disease [17, 28], type I diabetes [29], and coronary  
78 heart disease [30]. These studies suggest a significant role of gut virome in human health, however,  
79 some essential issues of human gut virome, such as population heterogeneity and impacts of  
80 geography, lifestyle or environment, is still in shortage.  
81  
82 By studying the gut microbiome of migrated or short-term visiting peoples, previous studies had  
83 shown that their microbiota was markedly remodeled upon environmental change, but yet  
84 accompanied with maintenance of numerous individual or ethnic microbial characteristics [31-34].  
85 Herein, we depicted the compositional differences of gut virome between Chinese residents (n =  
86 24) and visiting Pakistani (n = 24) individuals living in the same city and also examined the  
87 repeatability of these differences in their child offsprings (respective n = 6). We quantified the  
88 DNA and RNA viromes from fecal VLPs, and parallely measured the bacterial microbiome for  
89 virus-bacteria association analysis. This pilot study provided evidences for the effect of ethnic  
90 backgrounds on human gut virome.

91

## 92 **Results**

### 93 **Population characteristics and study design**

94 This study included 30 Chinese residents and 30 visiting Pakistani individuals who were recruited  
95 at Dalian Medical University in March 2019. Both cohorts consisted of 24 healthy adults and 6 of  
96 their child offsprings (**Table 1**). All adults were students or young teachers of the Dalian Medical  
97 University, and the Pakistani adults and children had arrived in China for 0-18 months (average of  
98 11 months) and 0-15 months (average of 9 months), respectively. Notably, the Chinese and  
99 Pakistani adults showed significant differences on their body mass index (BMI), dietary habit, and  
100 drinking and smoking rates (**Table 1; Table S1**), which seemed to be due to ethnic and lifestyle  
101 differences.

102

103 Fecal samples of all participants were collected and treated using a unified approach (see  
104 Methods). To depict the gut viral characteristics of healthy individuals, we extracted DNA and  
105 RNA from fecal VLP fractions and performed high throughput shotgun sequencing using the  
106 Illumina platform. To extend the content of total microbial community, the bacterial microbiome  
107 of feces was also profiled using whole-metagenomic sequencing. The analytical workflow of the  
108 DNA virome, RNA virome, and bacterial microbiome was shown in **Figure 1**. Focusing on the  
109 comparison of gut viromes between Chinese and Pakistani individuals, overall, this study included  
110 six sections to elaborate the results:

111 1-2. DNA virome and its functional characteristics.

112 3-4. RNA virome and the concordance between DNA and RNA viromes.

113 5-6. Bacterial microbiome and the virus-bacteria associations.

114

### 115 **Comparison of DNA viral community**

116 We obtained 782 million high-quality non-human reads ( $12.1 \pm 0.5$  million per sample) through  
117 shotgun sequencing of the DNA viral community of 60 fecal samples. The reads were *de novo*  
118 assembled into 182,471 contigs with the minimum length threshold of 1kbp, of which 45.0%  
119 (82,119) were recognized as highly credible viral fragments based on their sequence features and  
120 homology to known viral genomes (**Figure 1**). The remaining contigs were from bacterial or  
121 eukaryotic contaminations (26.8%) and dependency-associated sequences (6.0%), and 22.2%  
122 contigs were still unclassifiable. Despite that, average 82.3% of sequencing reads in all samples  
123 were captured by the viral contigs, revealing well representativeness of the high-abundance viral  
124 contents in human gut DNA virome. The viral contigs were further clustered into 54,947 “viral  
125 operational taxonomic units (vOTUs)” (a phylogenetic definition of discrete viral lineage that  
126 corresponds to “species” in prokaryotes, also named “viral population” [35]) by removing the  
127 redundant contigs of 95% nucleotide similarity. These vOTUs represented an average size of  
128  $3,054 \pm 2,868$  bp (**Figure S1**), which was comparable with similar studies [14] but remarkable  
129 lower than that of the available viral genomes (average 38.5 kbp for ~6,500 complete virus  
130 isolates from the RefSeq database), suggesting that the vOTUs were mostly fragmented genomes.  
131 Only 33.6% of vOTUs could be annotated into specific family, highlighting a considerable novelty  
132 of gut virome.

133

134 Rarefaction analysis showed that, despite the rarefaction curve was unsaturated under current  
135 number of samples in each group, the vOTU richness was significantly higher in Pakistani adults  
136 than in Chinese adults ( $p=0.008$ , **Figure 2a**). The within-sample diversity pattern of gut DNA

137 viromes was assessed by macrodiversity (Shannon index) and microdiversity (nucleotide diversity  
138 or  $\pi$  [35]) at the vOTU level. The Chinese adults showed a lower Shannon index than the Pakistani  
139 adults, similarly for the children (**Figure 2b**), but no significant difference in microdiversity was  
140 detected between Chinese and Pakistanis (**Figure 2c**).

141

142 Next, we undertook a non-metric multidimensional scaling (NMDS) analysis to further understand  
143 the differences in fecal DNA viral communities between Chinese and Pakistanis. Clear separations  
144 were revealed in the viromes of both adults and children between Chinese and Pakistanis (*adonis*  
145  $p < 0.001$  for both adults and children; **Figure 2d**). Notably, we also found that 1) the viral  
146 communities of Chinese adults and children were similar, but those of Pakistani adults and  
147 children were differed, and 2) the viral communities of Pakistani children were closer to Chinese  
148 subjects when compared with those of Pakistani adults. These findings were validated by the  
149 permutational multivariate analysis of variance (PERMANOVA) (**Figure 2e**).

150

151 We finally compared the DNA virome composition of Chinese and Pakistani at the family level,  
152 ignoring the family-level unclassified vOTUs (which represented only 33.1% of total sequences).  
153 The most dominant viral families in all samples were *Podoviridae*-crAssphage (average relative  
154 abundance,  $27.0 \pm 30.7\%$ ), *Siphoviridae* ( $24.8 \pm 25.5\%$ ) and *Adenoviridae* ( $23.7 \pm 28.1\%$ ) (**Figure**  
155 **2f**). Compared with the Chinese adults, the viral communities of the Pakistani adults showed a  
156 significant increase of *Adenoviridae*, *Anelloviridae*, *Marseilleviridae*, and *Lavidaviridae*, and a  
157 remarkable depletion of *Circoviridae* and *Rudiviridae* (Mann-Whitney U test,  $q < 0.05$ ; **Figure 2g**).  
158 *Adenoviridae*, *Myoviridae*, *Phycodnaviridae*, *Mimiviridae*, *Herelleviridae*, and *Inoviridae* were

159 significant higher in viral communities of Pakistani children (**Figure 2h**), as compared with the  
160 Chinese children, while no viral family was lower.

161

## 162 **Functional analysis of DNA virome**

163 To better elucidate the functional capacity of the DNA viromes, we predicted a total of 221,418  
164 protein-coding genes from the vOTUs (average of 4 genes per vOTU) and annotated functions of  
165 24.2% of these genes based on the KEGG (Kyoto Encyclopedia of Genes and Genomes) [36]  
166 database. Analysis on KEGG pathway level B showed that functions involved in genetic  
167 information procession and signal and cellular processes are dominant in all samples (**Figure 3a**),  
168 suggesting that these are core functions of the gut DNA virome. Compared with the Chinese adults,  
169 viral functions in the Pakistani adults were significantly decreased involving “protein families:  
170 metabolism”, amino acid metabolism, antimicrobial drug resistance, cell motility, and substance  
171 dependence, and increased in immune disease (Mann-Whitney U test,  $q < 0.05$ ; **Figure 3b**). For  
172 example, a putative hemolysin enzyme (K03699) that encoded by several *Myoviridae* and  
173 *Siphoviridae* viruses showed over 10-fold enrichment in the virome of Chinese adults compared to  
174 that of Pakistani adults. When compared with the Chinese children, a number of important  
175 functions, including carbohydrate metabolism, signal transduction, and cell growth and death,  
176 were significantly higher in the viral communities of Pakistani children, while the “protein  
177 families: genetic information processing” were lower (**Figure 3c**).

178

179 We identified a total of 11,242 CAZymes (Carbohydrate-active enzymes [37]) from the viral genes,  
180 including 5,437 glycoside hydrolases, 3,270 glycosyl transferases, 1,993 carbohydrate binding,  
181 396 carbohydrate esterases, 120 polysaccharide lyases, and 26 auxiliary activities (**Figure 3d**).



182 The majority (65.9%) of CAZymes were encoded by unclassified vOTUs, followed by  
183 *Siphoviridae* (12.1%) and *Myoviridae* (8.2%), suggesting their important roles in carbohydrate  
184 metabolism in gut viral ecosystem. Moreover, we also identified 37 acquired antibiotic resistance  
185 genes (ARGs) from the DNA vOTUs (**Table S2**). Most of these ARGs were related to tetracycline  
186 resistance (n = 12), macrolide resistance (n = 7), beta-lactamase (n = 7), and aminoglycoside  
187 resistance (n = 6). Taken together, these findings revealed that the DNA virus can widely express  
188 the carbohydrate metabolism-associated genes and are potentially involved into carrying and  
189 transmission of antibiotic resistance genes.

190

#### 191 **Comparison of RNA viral community**

192 For RNA virome, we performed shotgun metatranscriptomic sequencing of 60 fecal samples  
193 described above and obtained 671 million reads ( $11 \pm 3.4$  million per sample) after removing the  
194 low-quality reads and bacterial ribosomal RNA contamination. A total of 99,454 contigs with  
195 minimum length threshold of 500 bp were assembled, 3,442 (3.5%) of which were identified as  
196 highly credible RNA viral fragments via blasting against the available RNA viral genomes and  
197 searching of the RNA-dependent RNA polymerase (RdRp) sequences (**Figure 1**). 25.4% of these  
198 RNA viruses contained at least one RdRp gene, while 28 viral RdRp genes had no homology with  
199 any known virus in NCBI database. We obtained 569 RNA vOTUs based on clustering at 95%  
200 nucleic acid level similarity. The average size of these vOTUs was  $1,162 \pm 916$  bp, which was  
201 fragmented compared with the available RNA viral genomes (average 7.4 kbp from ~4,000  
202 isolates). Furthermore, considering that only average 24.8% reads of all samples were covered  
203 from the RNA vOTUs, we also used the available RNA viral genomes from the RefSeq database  
204 as a reference for analyzing of the gut RNA virome. 118 available RNA viruses were observed in

205 our samples, which covered additional 1.3% reads (in average) for further analysis.

206 Rarefaction analysis showed that the detection of RNA virus was increased with the number of

207 samples, and the accumulative curve was nearly saturated at nearly 10 samples (**Figure 4a**). This

208 is due to our RNA virus pipeline mainly focused on the known species and the sequence

209 containing a RdRp gene, but high proportions of virus remain untagged and many of them are

210 independent on RdRp gene [38]. Compared with Pakistanis, the macrodiversity (Shannon index)

211 was significantly higher in Chinese adults, but there was no statistical difference in that of children

212 (**Figure 4b**).

213

214 NMDS analysis on the overall RNA vOTUs composition captured significant separation of adults

215 between Chinese and Pakistanis (*adonis*  $p < 0.001$ ; **Figure 4c**), but of children the separation was

216 visible but not significant (*adonis*  $p = 0.2$ ). Likewise, the viral communities of Chinese adults and

217 children were closer, yet of Pakistani adults and children.

218

219 Finally, to investigate the gut RNA viral signatures between Chinese and Pakistanis, we compared

220 two cohorts on viral composition. At the family level, the dominant family *Virgaviridae* consisted

221 of average 83.7% relative abundance in all samples (**Figure 4d**), which was slightly but

222 significantly enriched in Chinese adults compared with that in Pakistani adults (**Figure 4e**). Three

223 other families, *Betaflexiviridae*, *Picornaviridae*, and *Astroviridae*, was reduced in Chinese adults

224 than in Pakistani adults (Mann-Whitney U test,  $q < 0.05$  for all), while *Picornaviridae* was also

225 reduced in Chinese children than in Pakistani children. At the species level, the plant-associated

226 virus, including *Pepper mild mottle virus* (average relative abundance,  $37.5 \pm 23.1\%$ ), *Tomato*

227 *mosaic virus* ( $27.1 \pm 27.4\%$ ), and *Tobacco mild green mosaic virus* ( $14.1 \pm 12.4\%$ ), composed of  
228 the dominant species in all samples (**Figure 4f**). Compared with the Chinese adults, the viral  
229 communities of the Pakistani adults showed a significant increase of *Shallot latent virus*,  
230 *Picornavirales Tottori-HG2*, *Aichivirus A*, and *Astrovirus VA3*, and a remarkable depletion of  
231 *Paprika mild mottle virus*, *Peach virus T*, *Enterovirus C*, and *Cosavirus A* (**Figure 4g**). When  
232 compared with the Chinese children, 9 species were significantly higher in viral communities of  
233 Pakistani children (**Figure 4h**), with no species that was lower.

234

### 235 **Concordance between DNA and RNA viromes**

236 Having characterized the differences of DNA and RNA viromes between local Chinese residents  
237 and visiting Pakistanis, we wanted to examine the existence of concordance between DNA and  
238 RNA viromes. Although the DNA and RNA viromes were irrelevant in Shannon diversity index  
239 (Pearson  $r=0.04$ ,  $p=0.7$ ; **Figure 5a**), the overall compositions of two types of viral community  
240 were strongly correlated (Procrustes correlation  $M^2=0.37$ ,  $p<0.001$ ; **Figure 5b**). And this  
241 correlation was reproducible across nationality and age. Moreover, we identified 24 co-abundance  
242 correlations between 6 DNA and 9 RNA viral families (Spearman correlation test  $q<0.05$ ; **Figure**  
243 **5c**), including some positive correlations between *Adenoviridae* and several RNA viruses and a  
244 negative correlation between *Herpesviridae* and *Tombusviridae*. The significance of these  
245 relationships required further studies.

246

### 247 **Comparison of bacterial microbiome**

248 For bacterial microbiome, we obtained a total of 1,236 million reads ( $20.6 \pm 7.7$  million per  
249 sample) from the samples and quantified the relative abundances of a total of 833 taxa, including

250 12 phyla, 22 classified, 41 orders, 81 families, 179 genera, and 498 species, using MetaPhlan2  
251 [39]. Comparison on Shannon index showed that the bacterial microbiome of Chinese adults  
252 exhibited a significantly higher diversity than that of the Pakistanis (**Figure 6a**), similarly but not  
253 significantly trend was observed in that of children. NMDS analysis on the overall bacterial  
254 composition also revealed significant separation between Chinese and Pakistan adults (*adonis*  
255  $p<0.001$ ; **Figure 6b**), as well as between Chinese and Pakistan children (*adonis*  $p<0.001$ ).  
256 Consistent with the observations in DNA and RNA viromes, the bacterial microbiome of Pakistan  
257 children was also close to that of Chinese subjects in tendency.  
258  
259 Taxonomically, the bacterial microbiome of Chinese adults showed significant enrichment of  
260 *Lachnospiraceae*, *Ruminococcaceae*, *Eubacteriaceae*, *Enterobacteriaceae*, *Tannerellaceae*,  
261 *Rikenellaceae*, *Acidaminococcaceae* *Clostridiaceae*, and *Sutterellaceae* and depletion of  
262 *Prevotellaceae*, *Bifidobacteriaceae*, *Coriobacteriaceae*, *Lactobacillaceae*, *Oscillospiraceae*,  
263 *Selenomonadaceae*, and *Atopobiaceae*, compared with that of Pakistani adults (linear discriminant  
264 analysis [LDA] score  $>3$ ; **Figure 6c**). Similarly, *Clostridiaceae*, *Eubacteriaceae*, and  
265 *Ruminococcaceae* were enriched in Chinese children compared to Pakistani children, and  
266 *Coriobacteriaceae* was depleted. At the species level, the Chinese adults exhibited 28 enriched  
267 bacterial species and 19 decreased species when compared with the Pakistani adults, while the  
268 Chinese children showed 11 enriched species and 12 decreased species compared with the  
269 Pakistani children (**Table S3**). The exhibition of enormous differential taxa led to a dramatic  
270 distinction of enterotype constitution between Chinese and Pakistanis. The Chinese subjects was  
271 characterized by a high proportion of *Bacteroides/Firmicutes*-type (75% and 100% in adults and  
272 children, respectively), whereas almost of all Pakistani subjects were *Prevotella*-type (100% in

273 adults and 66.7% in children) (**Figure 6d**).

#### 274 **Virus-bacteria associations**

275 To study the virus-bacteria correlation, first, we predicted the bacterial hosts of virus by searching  
276 the potential viral CRISPR spacers from bacterial metagenomic assemblies (see Methods). This  
277 approach allowed host assignments for 3,948 DNA and 4 RNA vOTUs, representing 7.2% and 0.7%  
278 of all DNA and RNA viruses, respectively. We revealed a large connection network of family-level  
279 known virus ( $n = 392$ ) and its bacterial host (**Figure 7a**), facilitated by frequent acquisition of  
280 phage/prophage in bacterial genomes and spread of phages across bacterial hosts. Members of  
281 *Faecalibacterium*, *Prevotella*, *Ruminococcus*, *Bifidobacterium*, *Dialister*, and *Streptococcus* were  
282 the most common host for human gut virome. Meanwhile, the *crAss-like* phages had infected the  
283 highest number of bacteria.

284

285 Then, we performed the PERMANOVA-based effect size analysis between gut virome and  
286 microbiome. 287 DNA vOTUs ( $q < 0.10$ ), including members of *Siphoviridae*, *Phycodnaviridae*,  
287 and *Podoviridae*-*crAss*phage, and 25 RNA vOTUs ( $q < 0.10$ ) showed significant affection on the  
288 bacterial microbiome communities (**Figure 7b-c**). More importantly, combination of these DNA  
289 and RNA vOTUs explained 20.2% and 18.2% of the microbiome variance, respectively (**Figure**  
290 **7d**), suggesting that the effect size of the gut virome on bacterial microbiome is considerable.  
291 Similar effect sizes were found in subjects from two nations. Parallely, 117 bacterial species were  
292 identified that significantly impact the holistic composition of DNA and RNA viromes, accounting  
293 for 13.2% virome variance (**Figure 7d**). These species included *Bifidobacterium angulatum*,  
294 *Streptococcus salivarius*, *Bacteroides coprophilus*, and *Prevotella copri* (**Figure 7e**).

295

## 296 **Discussion**

297 Both ethnic origin and residential environment have negligible effects on individual's gut  
298 microbiome [32, 40-42]. To extend this finding on gut virome, our study focused on the viral  
299 community of a cohort of Chinese and visiting Pakistanis. Despite sharing the residential  
300 environment, the viral diversity and composition of Chinese and Pakistanis were dramatically  
301 differed, suggesting that the ethnicity-specific characteristics of virome enable to maintain over an  
302 extended period (average 11 and 9 months for Pakistani adults and children, respectively). This  
303 result was in accordance with an earlier study showing that the individual characteristics of gut  
304 virome can be relatively stable for at least one year [14].

305

306 Using *de novo* assembly and discovery approaches, we identified a huge number of viruses from  
307 the subjects' fecal samples, including approximately 55,000 non-redundant complete and partial  
308 DNA viral genomes and 569 non-redundant RNA viruses, particularly the number of DNA vOTUs  
309 increased over 8-fold compared with the isolated viral sequences in RefSeq database. The majority  
310 of viruses were unclassified even at the family level, in agreement with previous observations of  
311 extensive novelty of viral world in multiple environments as well as in human gut [43-45].

312

313 The DNA viral macrodiversity of Chinese adults was lower than that of Pakistani adults, whereas  
314 an opposite phenomenon was observed in the diversity of bacterial community. This result was in  
315 conflict with the observation in US adults which exhibited strong correlation between gut virome  
316 and microbiome diversities [4]. As most of the DNA viruses were bacteriophages (in this study,

317 the bacterial hosts of at least 7.2% DNA viruses were verified) [4], the degree to which bacterial  
318 microbiome drives the virome diversity is considerable. The explanation for high DNA viral  
319 diversity in Pakistani adults was unknown, but reason for the enrichment of some eukaryotic  
320 viruses in their gut was speculated (see the following discussion). In contrast to DNA virome, the  
321 RNA viral diversity was higher in Chinese adults than in Pakistani adults. This observation could  
322 be due to the difference of dietary habits between two groups, as in fact the gut RNA viruses were  
323 generally plant-associated viruses in our cohort.  
324  
325 Significant compositional differences were observed in DNA and RNA viromes, so was bacterial  
326 microbiome between Chinese residents and visiting Pakistanis. In DNA virome, the Pakistani  
327 adults showed remarkable enrichment of two eukaryotic viruses, *Adenoviridae* and *Anelloviridae*.  
328 Members of *Adenoviridae* were the most prevalent human-associated viruses that can cause  
329 respiratory infection, gastroenteritis, and multi-organ diseases [46-48]; while some members of  
330 *Anelloviridae* were also associated with human viral infections [49]. *Adenoviridae* was also highly  
331 abundant in the gut of Pakistani children but was rare in that of Chinese children, suggesting  
332 potential transmission of such viruses from Pakistani parents to their offsprings. In RNA virome,  
333 some members of the plant-associated virus *Virgaviridae* were enriched in Pakistanis but some  
334 others were reduced. This finding was thought to be connected to the difference of dietary habits  
335 between two cohorts. For example, the abundance of *Shallot latent virus* was higher in Pakistani  
336 adults than in Chinese adults, as the shallot (e.g. onion, leek) is commonly used in halal foods in  
337 the school canteen but rarely appeared in Chinese foods (based on the authors' experience). In  
338 addition, some members of the Pakistani adult-enriched *Picornaviridae*, including *Picornavirales*  
339 *Tottori-HG2*, *Enterovirus C*, and *Cosavirus A*, and *Astroviridae* were well-known human

340 enteroviruses that can cause diarrhea and enteric infections [50-52]. In bacterial microbiome, the  
341 enterotype distribution of Chinese and Pakistanis was deviated, characterized by a high proportion  
342 of *Bacteroides/Firmicutes*-type (associated with diets enriched animal carbohydrates [53, 54]) and  
343 low proportion of *Prevotella*-type (associated with plant fiber-enriched diets [55]) in Chinese  
344 subjects. Combination of these findings suggested that the dietary habits may be a key driver for  
345 shaping the gut RNA virome and bacterial microbiome. Of course, more proof-of-principle studies  
346 are needed in future.

347

348 One striking observation was that the DNA virome of Pakistan children is closer to that of Chinese  
349 subjects, when compared with the degree of deviation between Chinese and Pakistan adults. This  
350 phenomenon was also observed in RNA virome and bacterial microbiomes in tendency. These  
351 findings suggested that the virome and microbiome of children was more changeable than that of  
352 adults, despite the fact that the Pakistan adult participants seemed to live a bit longer in China. In  
353 accordance with the previous studies, the infant or child gut microbiome was less stable under the  
354 changes of environmental, dietary pattern, and antibiotic usage [56-58]. In addition, dynamic  
355 development of the infant gut virome towards a more stable adult-like gut virome was also  
356 confirmed by recent studies [21, 59, 60].

357

358 We characterized the functional capacity of gut virome by identifying over 53,000 KEGG  
359 annotated protein-coding genes, of which the core functions seemed consistent with previous  
360 findings in the gut phage catalog [61]. Different from the observation in DNA viral composition,  
361 the Chinese adults revealed a more diver functional profile than that of the Pakistani adults, as  
362 revealed by more metabolism-associated genes in Chinese adults. In addition to general functions,



363 we also identified over 11,000 CAZymes and 37 antibiotic resistance genes from all DNA viruses.

364 To the best of our knowledge, the appearance of extensive CAZymes in gut virome was first found

365 in this study. Potential viral contributions to complex carbon degradation were validated in ocean

366 and soil ecosystems [62, 63]. Thus, our findings further highlight the importance of viral

367 carbohydrate metabolism capacity in human gut. Moreover, the virus-encoded ARGs was also

368 directly relevant to human health, consistent with previous studies [64].

369

370 Not only bacteriophages but also free-living viruses in human gut can influence bacterial

371 microbiome structure and therefore indirectly affect health status [65, 66]. We confirmed

372 remarkable connections between viruses and bacterial hosts in our study cohort, including the

373 previous-known parasitic relations (e.g. *crAss-like* phages and Bacteroidetes members [18, 67])

374 and many novel connections. Noticeably, the Pakistani-dominated genus *Prevotella* connected the

375 largest number of viruses and was responsible for a large part of variance in the virome

376 composition, in agreement with the previous studies showing that the high relative level of

377 *Prevotella* lead to a higher prevalence of temperate bacteriophages and increased virome

378 macrodiversity [14]. One the other hand, we also statistically revealed that the gut virome was also

379 an important determinator of the bacterial microbiome.

380

381 As all participants shared the residential environment, we were only able to study the effect of

382 nationality on their gut virome. Through collecting samples from the visiting Pakistani before they

383 arrived China or from other local Pakistani residents, future research is believed to confirm the

384 effect of environment on gut virome. Other limitations in this study included 1) the relatively

385 small sample size, 2) the lack of longitudinal sampling for the individuals, and 3) the inadequacy  
386 of viral reference database. These limitations did not affect the robustness of results in the current  
387 cohort, but follow-up studies in wider populations will still complement some deficiencies of the  
388 current study and provide more new findings.

## 389 **Summary**

390 In conclusion, we systematically described the baseline gut virome in a well-characterized cohort  
391 of Chinese and visiting Pakistanis and demonstrated that the national background contributed a  
392 primary variation to gut virome. The mechanisms underlying the difference between two cohorts  
393 remain unclear, but the ethnic factor must be proposed and considered in designing future studies  
394 of the virome.

395

## 396 **Methods**

### 397 **Subject and sample collection**

398 This study received approval from the ethics committee of Dalian Medical University, and written  
399 informed consent was obtained from each participant. The methods were carried out in accordance  
400 with the approved guidelines. Thirty healthy Pakistani from Dalian Medical University and thirty  
401 BMI-, dietary habit-, alcohol intake- and frequency of smoking-matched Chinese healthy controls  
402 were recruited for this study. Each cohort was consisted of 24 healthy adults and 6 of their healthy  
403 child offsprings. Fresh fecal samples were collected from each subject and were immediately  
404 stored at a -80°C freezer.

405

### 406 **Experimental procedures for DNA and RNA viromes**

407 *Virus-like particles enrichment.* The procedure of VLPs enrichment was performed on ice. Add  
408 0.1g fecal sample into 1 ml HBSS buffer (137 mM NaCl, 5.4 mM KCl, 1.3 mM CaCl<sub>2</sub>, 0.3 mM  
409 Na<sub>2</sub>HPO<sub>4</sub>·2H<sub>2</sub>O, 0.5 mM MgCl<sub>2</sub>·7H<sub>2</sub>O, 0.4 mM KH<sub>2</sub>PO<sub>4</sub>, 0.6 mM MgSO<sub>4</sub>·7H<sub>2</sub>O, 4.2 mM  
410 NaHCO<sub>3</sub>, 5.6 mM D-glucose), centrifuge at 10000 g twice to obtain supernatant. After filtering to  
411 sterilize, the sterilized filtrate was mixed with the same volume of HBSS buffer and centrifuged  
412 at 750,000 g for an hour, the supernatant was stored at -80°C. The pellet was collected for DNA  
413 extraction.

414

415 *Viral DNA and RNA extraction.* The DNA and RNA of virus were extracted by using TIANamp  
416 Virus DNA / RNA Kit (TIANGEN) according to the manufacturer's protocols. Prepare the  
417 mixture contained extracted viral DNA, 1µl 20 mM random primers D2-8N (5'-  
418 AAGCTAAGACGGCGGTTCGGNNNNNNNN-3'), 1 µl 10xRT mix, 1 µl 10 mM dNTP and 11.5  
419 µl DEPC H<sub>2</sub>O. To synthesize the first strand of viral DNA, desaturated mixture at 95 °C for 5 min,  
420 add Klenow fragment solution (0.15 µl 10x Klenow Buffer, 0.5 µl Klenow fragment, 0.85 µl  
421 DEPC H<sub>2</sub>O) at 37 °C. The procedure should be performed twice to obtain two-strand viral DNA.  
422 The extracted RNA was reverse transcribed by using Vazyme HiScript II 1st Strand cDNA  
423 Synthesis Kit (+gDNA wiper) with the same random amplification primer. The two-strand of  
424 cDNA could be synthesized by the same approach.

425

426 *cDNA preparation.* Add the mixture contained rSAP and exonuclease-1 into viral two-strand DNA  
427 and cDNA at 37 °C, respectively, to remove the remained dNTP and primer D2-8N. After 1 hour,  
428 add 10 µl 5X Q5 Reaction Buffer, 3 µl 50 mM MgCl<sub>2</sub>, 1.5 µl 10 mM dNTP, 3 µl 20 mM primer

429 D2 (5' - AAGCTAAGACGGCGGTTCCGG -3'), 1.25 µl Q5 High-Fidelity DNA Polymerase and  
430 23.25 µl DEPC H<sub>2</sub>O to amplify the viral DNA and cDNA by polymerase chain reaction (PCR).  
431 DNA and cDNA were stored at -20°C freezer. The DNA and RNA concentration and purity  
432 were quantified with NanoDrop2000. DNA and cDNA quality were examined with a 1% agarose  
433 gel electrophoresis system.

434

435 *Shotgun sequencing of viromes.* All the DNA and cDNA viral samples were subjected to shotgun  
436 metagenomic sequencing by using the Illumina HiSeq 3000 platform. Libraries were prepared  
437 with a fragment length of approximately 350 bp. Paired-end reads were generated using 150 bp in  
438 the forward and reverse directions.

439

#### 440 **Bioinformatic analysis of DNA and RNA viromes**

441 *DNA virome assembly, identification, clustering and taxonomy.* The quality control of DNA  
442 virome sequences was performed using fastp [68], and the human reads were removed based on  
443 Bowtie2 [69] alignment. Each sample was individually assembled using metaSPAdes [70].  
444 Proteins of the contigs were predicted using Prodigal [71]. After that, the assembled contigs  
445 (>1,000 bp) were identified as viruses when it satisfied one of the following criteria: 1) at least 3  
446 proteins of a contig (or at least 50% proteins if the contig had less than 6 proteins) were assigned  
447 into the viral protein database integrating from NCBI reference viral genomes and the virus  
448 orthologous groups database (<http://vogdb.org>), with a maximum pairwise alignment e-value  
449 1e-10 based on DIAMOND [72]; 2) score >0.7 and p-value <0.05 in the VirFinder [73], a k-mer  
450 based tool for identifying viral sequences from assembled metagenomic data; 3) at least 2 proteins

451 were uncharacterized from the integrated databases of KEGG [36], NCBI-nr, and UniProt [74].

452 Viral contigs were pairwise blasted and the highly consistent viruses with 95% nucleotide identity  
453 and 80% coverage of the sequence were further clustered into vOTUs using inhouse scripts. The  
454 longest viral contig was defined as representative sequence for each vOTU. Proteins of the vOTUs  
455 were aligned with the available viral proteins using blastp (minimum score 50), and the family  
456 level taxonomy of a vOTU was generated if more than a third of its proteins were assigned into  
457 the same viral family.

458

459 *Macrodiversity and microdiversity of DNA virome.* The macrodiversity (Shannon diversity index)  
460 of virome was calculated using *vegan* package in R platform, with a uniformed number of reads (1  
461 million) for each sample. The microdiversity (nucleotide diversity,  $\pi$ ) for representative sequence  
462 in each vOTU was calculated based on the methodology developed by Schloissnig *et al.* [75], and  
463 microdiversity of a sample was generated by averaging from the viruses that presented  
464 (depth >10x) in that sample.

465

466 *Functional profiles of DNA virome.* The viral proteins were aligned to KEGG [36] database (blastp  
467 similarity >30%) for functional annotation. For functional profiling, the KEGG aligned proteins  
468 were dereplicated with CD-HIT [76] (>95% identity and >90% sequence coverage) to construct  
469 the custom viral functional gene catalog, followed by mapping the reads to the catalog using the  
470 ‘very-sensitive-local’ setting in Bowtie2 [69]. The relative abundance of each functional gene in  
471 sample was normalized by the total numbers of viral reads (the reads mapped to the viral sequence)  
472 in the sample, and was transformed into centered log ratio (CLR) coordinates using *microbiome*

473 package in R platform. The carbohydrate-active enzymes and acquired antibiotic resistance genes  
474 for the viruses were predicted from the CAZy [37] and CARD [77] databases, respectively, using  
475 the same manner as functional assignment.

476

477 *RNA viromes assembly, identification, clustering and taxonomy*. The metatranscriptomic data of  
478 RNA virome reads was trimmed using fastp [68]. The contamination of ribosomal RNA reads was  
479 identified and removed by mapping to the small subunit sequences (bacterial 16S and eukaryotic  
480 18S) on the latest SILVA database [78]. The rnaSPAdes was utilized in metatranscriptomic  
481 assembly for each sample [79]. To identify RNA viruses, the assembled contigs (>500 bp) was  
482 aligned to the reference RNA virus proteins downloaded from GenBank database using  
483 DIAMOND (blastx e-value <1e-5). We also identified the RNA viral contigs by searching the  
484 RNA-dependent RNA polymerase genes (RdRp genes, referred from Evan *et al.* [80]) using a  
485 Hidden Markov Model approach [81]. Then, the RNA viral sequences were clustered based on 95%  
486 identity and 90% coverage of the sequence.

487

#### 488 **Bacterial microbiome sequencing and analysis**

489 All raw metagenomic data was trimmed and the human contamination sequences was removed  
490 using the same methods in virome. MetaPhlan2 [39] was employed to generate the taxonomic  
491 profile for each sample using default parameters. Enterotype analysis was performed at the  
492 bacterial genus level composition based on the methodology developed by Costea *et al.* [55]. The  
493 high quality microbiome data was assembled using metaSPAdes [70], and the resulting contigs  
494 was searched against the NCBI-nt database to identify the bacteria sequence (>70% similarity

495 and >70% coverage at the phylum level). To search the potential bacterial host of virus, the  
496 CRISPR spacers in bacteria sequence was predicted using PILER-CR [82], and then the spacers  
497 were blasted to the viral sequences (“blastn-short” mode and bitscore >50) to identify the  
498 phage-bacterial host pairs. The matching bacterial host and viral sequence was summarized at the  
499 genus level. To avoid ambiguity, genus producing highest number of spacers hits was considered  
500 as primary host.

501

## 502 **Statistical analysis**

503 Statistical analyses were implemented at the R 3.6 platform (<https://www.r-project.org/>).  
504 Permutational multivariate analysis of variance (PERMANOVA) was performed with the *adonis*  
505 function of the *vegan* package, and the *adonis* *P*-value was generated based on 1,000 permutations.  
506 The method of effect size analysis was referred as Wang *et al.* [10]. The no-metric  
507 multidimensional scaling (NMDS) analysis was used as the ordination methods (*metaMDS*  
508 function in *vegan* package) for compositional data. The Procrustes coordinates analysis and  
509 significance were generated using the *procuste* and *procuste.randtest* functions in *vegan* package.  
510 The principal component analysis (PCA) was performed and visualized using the *ade4* package.  
511 The Wilcoxon rank-sum test was used to measure statistical differences in diversity and taxonomic  
512 levels between two cohorts. *P*-values were corrected for multiple testing using the  
513 Benjamini-Hochberg procedure.

514

## 515 **Data availability**

516 The raw sequencing dataset acquired in this study has been deposited to the NCBI SRA database  
517 under the accession code PRJNA641593. The sample metadata, vOTU and taxonomic

518 composition data, and the statistical scripts are available from the corresponding author on

519 reasonable request.

520

### 521 **Acknowledgements/funding**

522 This work was supported by grants from the Priority Academic Program Development of Jiangsu

523 Higher Education Institutions (Integration of Chinese and Western Medicine), the National

524 Natural Science Foundation of China (No. 81902037) and the Liaoning Provincial Natural Science

525 Foundation (No. 20180530086).

526

### 527 **Author contributions**

528 T. M., S. L., Y. M., and Q.Y. conceived and directed the study. Q. Y., Y. W., X. C., G. W., T. A. and

529 X. L. developed and conducted the experiments. Q. Y., G. W. and T. A. performed sample

530 collection and investigation. H. J., K. G., Y. Z., and P. Z. carried out data processing and analyses.

531 S. L., Q. Y., and T. M. drafted the manuscript. Y. M., G. W., Y. L.; J. W.; G. C.; A. Z. and P. L.

532 participated in design and coordination, and helped draft the manuscript. P. Z., Y. S., M. X. and P.

533 L. revised the manuscript. All authors read and approved the final manuscript.

534

### 535 **Competing interests**

536 The authors declare no competing interests.

537

538

### 539 **Reference**

540 1. Sender R, Fuchs S, Milo R. Are We Really Vastly Outnumbered? Revisiting the Ratio of



- 541 Bacterial to Host Cells in Humans. *Cell*. 2016; 164(3):337-340.
- 542 2. Vandeputte D, Kathagen G, D'Hoe K, Vieira-Silva S, Valles-Colomer M, Sabino J, Wang J,  
543 Tito RY, De Commer L, Darzi Y et al. Quantitative microbiome profiling links gut community  
544 variation to microbial load. *Nature*. 2017; 551(7681):507-511.
- 545 3. Castro-Mejia JL, Muhammed MK, Kot W, Neve H, Franz CM, Hansen LH, Vogensen FK,  
546 Nielsen DS. Optimizing protocols for extraction of bacteriophages prior to metagenomic  
547 analyses of phage communities in the human gut. *Microbiome*. 2015; 3:64.
- 548 4. Moreno-Gallego JL, Chou SP, Di Rienzi SC, Goodrich JK, Spector TD, Bell JT, Youngblut  
549 ND, Hewson I, Reyes A, Ley RE. Virome Diversity Correlates with Intestinal Microbiome  
550 Diversity in Adult Monozygotic Twins. *Cell Host Microbe*. 2019; 25(2):261-272 e265.
- 551 5. Marchesi JR. Prokaryotic and eukaryotic diversity of the human gut. *Adv Appl Microbiol*.  
552 2010; 72:43-62.
- 553 6. Turnbaugh PJ, Ley RE, Mahowald MA, Magrini V, Mardis ER, Gordon JI. An  
554 obesity-associated gut microbiome with increased capacity for energy harvest. *Nature*. 2006;  
555 444(7122):1027-1031.
- 556 7. Qin J, Li R, Raes J, Arumugam M, Burgdorf KS, Manichanh C, Nielsen T, Pons N, Levenez F,  
557 Yamada T et al. A human gut microbial gene catalogue established by metagenomic  
558 sequencing. *Nature*. 2010; 464(7285):59-65.
- 559 8. Lloyd-Price J, Mahurkar A, Rahnavard G, Crabtree J, Orvis J, Hall AB, Brady A, Creasy HH,  
560 McCracken C, Giglio MG et al. Strains, functions and dynamics in the expanded Human  
561 Microbiome Project. *Nature*. 2017; 550(7674):61-66.
- 562 9. Pedersen HK, Gudmundsdottir V, Nielsen HB, Hyotylainen T, Nielsen T, Jensen BA, Forslund

- 563 K, Hildebrand F, Prifti E, Falony G et al. Human gut microbes impact host serum metabolome  
564 and insulin sensitivity. *Nature*. 2016; 535(7612):376-381.
- 565 10. Wang X, Yang S, Li S, Zhao L, Hao Y, Qin J, Zhang L, Zhang C, Bian W, Zuo L et al. An  
566 aberrant gut microbiota alters host metabolome and impacts renal failure in human and rodents.  
567 2020. doi:10.1136/gutjnl-2019-319766.
- 568 11. Qin J, Li Y, Cai Z, Li S, Zhu J, Zhang F, Liang S, Zhang W, Guan Y, Shen D et al. A  
569 metagenome-wide association study of gut microbiota in type 2 diabetes. *Nature*. 2012;  
570 490(7418):55-60.
- 571 12. Quigley EM. Gut bacteria in health and disease. *Gastroenterol Hepatol (N Y)*. 2013;  
572 9(9):560-569.
- 573 13. Handley SA. The virome: a missing component of biological interaction networks in health  
574 and disease. *Genome Med*. 2016; 8(1):32.
- 575 14. Shkoporov AN, Clooney AG, Sutton TDS, Ryan FJ, Daly KM, Nolan JA, McDonnell SA,  
576 Khokhlova EV, Draper LA, Forde A et al. The Human Gut Virome Is Highly Diverse, Stable,  
577 and Individual Specific. *Cell Host Microbe*. 2019; 26(4):527-541 e525.
- 578 15. Forster SC, Kumar N, Anonye BO, Almeida A, Viciani E, Stares MD, Dunn M, Mkandawire  
579 TT, Zhu A, Shao Y et al. A human gut bacterial genome and culture collection for improved  
580 metagenomic analyses. *Nat Biotechnol*. 2019; 37(2):186-192.
- 581 16. Zou Y, Xue W, Luo G, Deng Z, Qin P, Guo R, Sun H, Xia Y, Liang S, Dai Y et al. 1,520  
582 reference genomes from cultivated human gut bacteria enable functional microbiome analyses.  
583 *Nat Biotechnol*. 2019; 37(2):179-185.
- 584 17. Norman JM, Handley SA, Baldrige MT, Droit L, Liu CY, Keller BC, Kambal A, Monaco CL,

- 585 Zhao G, Fleshner P et al. Disease-specific alterations in the enteric virome in inflammatory  
586 bowel disease. *Cell*. 2015; 160(3):447-460.
- 587 18. Shkoporov AN, Khokhlova EV, Fitzgerald CB, Stockdale SR, Draper LA, Ross RP, Hill C.  
588 PhiCrAss001 represents the most abundant bacteriophage family in the human gut and infects  
589 *Bacteroides intestinalis*. *Nat Commun*. 2018; 9(1):4781.
- 590 19. Yutin N, Makarova KS, Gussow AB, Krupovic M, Segall A, Edwards RA, Koonin EV.  
591 Discovery of an expansive bacteriophage family that includes the most abundant viruses from  
592 the human gut. *Nat Microbiol*. 2018; 3(1):38-46.
- 593 20. Minot S, Bryson A, Chehoud C, Wu GD, Lewis JD, Bushman FD. Rapid evolution of the  
594 human gut virome. *Proc Natl Acad Sci U S A*. 2013; 110(30):12450-12455.
- 595 21. Lim ES, Zhou Y, Zhao G, Bauer IK, Droit L, Ndao IM, Warner BB, Tarr PI, Wang D, Holtz LR.  
596 Early life dynamics of the human gut virome and bacterial microbiome in infants. *Nat Med*.  
597 2015; 21(10):1228-1234.
- 598 22. Hoyles L, McCartney AL, Neve H, Gibson GR, Sanderson JD, Heller KJ, van Sinderen D.  
599 Characterization of virus-like particles associated with the human faecal and caecal microbiota.  
600 *Res Microbiol*. 2014; 165(10):803-812.
- 601 23. Kleiner M, Hooper LV, Duerkop BA. Evaluation of methods to purify virus-like particles for  
602 metagenomic sequencing of intestinal viromes. *BMC Genomics*. 2015; 16:7.
- 603 24. Pannaraj PS, Ly M, Cerini C, Saavedra M, Aldrovandi GM, Saboory AA, Johnson KM, Pride  
604 DT. Shared and Distinct Features of Human Milk and Infant Stool Viromes. *Front Microbiol*.  
605 2018; 9:1162.
- 606 25. Maqsood R, Rodgers R, Rodriguez C, Handley SA, Ndao IM, Tarr PI, Warner BB, Lim ES,

- 607 Holtz LR. Discordant transmission of bacteria and viruses from mothers to babies at birth.  
608 Microbiome. 2019; 7(1):156.
- 609 26. Nakatsu G, Zhou H, Wu WKK, Wong SH, Coker OO, Dai Z, Li X, Szeto CH, Sugimura N,  
610 Lam TY et al. Alterations in Enteric Virome Are Associated With Colorectal Cancer and  
611 Survival Outcomes. Gastroenterology. 2018; 155(2):529-541 e525.
- 612 27. Hannigan GD, Duhaime MB, Ruffin MT, Koumpouras CC, Schloss PD. Diagnostic Potential  
613 and Interactive Dynamics of the Colorectal Cancer Virome. mBio. 2018; 9(6).
- 614 28. Zuo T, Lu XJ, Zhang Y, Cheung CP, Lam S, Zhang F, Tang W, Ching JYL, Zhao R, Chan PKS  
615 et al. Gut mucosal virome alterations in ulcerative colitis. Gut. 2019; 68(7):1169-1179.
- 616 29. Zhao G, Vatanen T, Droit L, Park A, Kostic AD, Poon TW, Vlamakis H, Siljander H, Harkonen  
617 T, Hamalainen AM et al. Intestinal virome changes precede autoimmunity in type I  
618 diabetes-susceptible children. Proc Natl Acad Sci U S A. 2017; 114(30):E6166-E6175.
- 619 30. Guo L, Hua X, Zhang W, Yang S, Shen Q, Hu H, Li J, Liu Z, Wang X, Wang H et al. Viral  
620 metagenomics analysis of feces from coronary heart disease patients reveals the genetic  
621 diversity of the Microviridae. Virol Sin. 2017; 32(2):130-138.
- 622 31. Vangay P, Johnson AJ, Ward TL, Al-Ghalith GA, Shields-Cutler RR, Hillmann BM, Lucas SK,  
623 Beura LK, Thompson EA, Till LM et al. US Immigration Westernizes the Human Gut  
624 Microbiome. Cell. 2018; 175(4):962-972 e910.
- 625 32. Deschasaux M, Bouter KE, Prodan A, Levin E, Groen AK, Herrema H, Tremaroli V, Bakker  
626 GJ, Attaye I, Pinto-Sietsma SJ et al. Depicting the composition of gut microbiota in a  
627 population with varied ethnic origins but shared geography. Nat Med. 2018;  
628 24(10):1526-1531.

- 629 33. He Y, Wu W, Zheng HM, Li P, McDonald D, Sheng HF, Chen MX, Chen ZH, Ji GY, Zheng  
630 ZD et al. Regional variation limits applications of healthy gut microbiome reference ranges  
631 and disease models. *Nat Med.* 2018; 24(10):1532-1535.
- 632 34. Sun J, Liao XP, D'Souza AW, Boolchandani M, Li SH, Cheng K, Luis Martinez J, Li L, Feng  
633 YJ, Fang LX et al. Environmental remodeling of human gut microbiota and antibiotic  
634 resistome in livestock farms. *Nat Commun.* 2020; 11(1):1427.
- 635 35. Gregory AC, Zayed AA, Conceicao-Neto N, Temperton B, Bolduc B, Alberti A, Ardyna M,  
636 Arkhipova K, Carmichael M, Cruaud C et al. Marine DNA Viral Macro- and Microdiversity  
637 from Pole to Pole. *Cell.* 2019; 177(5):1109-1123 e1114.
- 638 36. Kanehisa M, Furumichi M, Tanabe M, Sato Y, Morishima K. KEGG: new perspectives on  
639 genomes, pathways, diseases and drugs. *Nucleic Acids Res.* 2017; 45(D1):D353-D361.
- 640 37. Lombard V, Golaconda Ramulu H, Drula E, Coutinho PM, Henrissat B. The  
641 carbohydrate-active enzymes database (CAZy) in 2013. *Nucleic Acids Res.* 2014; 42(Database  
642 issue):D490-495.
- 643 38. Wolf YI, Kazlauskas D, Iranzo J, Lucia-Sanz A, Kuhn JH, Krupovic M, Dolja VV, Koonin EV.  
644 Origins and Evolution of the Global RNA Virome. *mBio.* 2018;9(6):e02329-18.
- 645 39. Truong DT, Franzosa EA, Tickle TL, Scholz M, Weingart G, Pasolli E, Tett A, Huttenhower C,  
646 Segata N. MetaPhlan2 for enhanced metagenomic taxonomic profiling. *Nat Methods.* 2015;  
647 12(10):902-903.
- 648 40. Gupta VK, Paul S, Dutta C. Geography, Ethnicity or Subsistence-Specific Variations in Human  
649 Microbiome Composition and Diversity. *Front Microbiol.* 2017; 8:1162.
- 650 41. Gaulke CA, Sharpton TJ. The influence of ethnicity and geography on human gut microbiome

- 651 composition. *Nat Med.* 2018; 24(10):1495-1496.
- 652 42. Korpela K, Costea P, Coelho LP, Kandels-Lewis S, Willemsen G, Boomsma DI, Segata N,  
653 Bork P. Selective maternal seeding and environment shape the human gut microbiome.  
654 *Genome Res.* 2018; 28(4):561-568.
- 655 43. Reyes A, Semenkovich NP, Whiteson K, Rohwer F, Gordon JI. Going viral: next-generation  
656 sequencing applied to phage populations in the human gut. *Nat Rev Microbiol.* 2012;  
657 10(9):607-617.
- 658 44. Paez-Espino D, Eloje-Fadrosch EA, Pavlopoulos GA, Thomas AD, Huntemann M, Mikhailova  
659 N, Rubin E, Ivanova NN, Kyrpides NC. Uncovering Earth's virome. *Nature.* 2016;  
660 536(7617):425-430.
- 661 45. Rampelli S, Turrone S, Schnorr SL, Soverini M, Quercia S, Barone M, Castagnetti A, Biagi E,  
662 Gallinella G, Brigidi P et al. Characterization of the human DNA gut virome across  
663 populations with different subsistence strategies and geographical origin. *Environ Microbiol.*  
664 2017; 19(11):4728-4735.
- 665 46. Wadell G. Adenoviridae. the adenoviruses. In: *Laboratory Diagnosis of Infectious Diseases*  
666 *Principles and Practice.* Springer. 1988: 284-300.
- 667 47. Centers for Disease C, Prevention. Acute respiratory disease associated with adenovirus  
668 serotype 14--four states, 2006-2007. *MMWR Morb Mortal Wkly Rep.* 2007;  
669 56(45):1181-1184.
- 670 48. Jones MS, Harrach B, Ganac RD, Gozum MM, dela Cruz WP, Riedel B, Pan C, Delwart EL,  
671 Schnurr DP. New adenovirus species found in a patient presenting with gastroenteritis. *Journal*  
672 *of virology.* 2007; 81(11):5978-5984.

- 673 49. Bernardin F, Operskalski E, Busch M, Delwart E. Transfusion transmission of highly prevalent  
674 commensal human viruses. *Transfusion*. 2010; 50(11):2474-2483.
- 675 50. Johnston S, Sanderson G, Pattemore P, Smith S, Bardin P, Bruce C, Lambden P, Tyrrell D,  
676 Holgate S. Use of polymerase chain reaction for diagnosis of picornavirus infection in subjects  
677 with and without respiratory symptoms. *Journal of clinical microbiology*. 1993; 31(1):111-117.
- 678 51. Monroe SS, Jiang B, Stine SE, Koopmans M, Glass R. Subgenomic RNA sequence of human  
679 astrovirus supports classification of Astroviridae as a new family of RNA viruses. *Journal of*  
680 *virology*. 1993; 67(6):3611-3614.
- 681 52. Rotbart HA. Treatment of picornavirus infections. *Antiviral research*. 2002; 53(2):83-98.
- 682 53. De Filippo C, Cavalieri D, Di Paola M, Ramazzotti M, Poullet JB, Massart S, Collini S,  
683 Pieraccini G, Lionetti P. Impact of diet in shaping gut microbiota revealed by a comparative  
684 study in children from Europe and rural Africa. *Proc Natl Acad Sci U S A*. 2010;  
685 107(33):14691-14696.
- 686 54. David LA, Maurice CF, Carmody RN, Gootenberg DB, Button JE, Wolfe BE, Ling AV, Devlin  
687 AS, Varma Y, Fischbach MA et al. Diet rapidly and reproducibly alters the human gut  
688 microbiome. *Nature*. 2014; 505(7484):559-563.
- 689 55. Costea PI, Hildebrand F, Arumugam M, Backhed F, Blaser MJ, Bushman FD, de Vos WM,  
690 Ehrlich SD, Fraser CM, Hattori M et al. Enterotypes in the landscape of gut microbial  
691 community composition. *Nat Microbiol*. 2018; 3(1):8-16.
- 692 56. Koenig JE, Spor A, Scalfone N, Fricker AD, Stombaugh J, Knight R, Angenent LT, Ley RE.  
693 Succession of microbial consortia in the developing infant gut microbiome. *Proc Natl Acad Sci*  
694 *U S A*. 2011;108 Suppl 1:4578-4585.

- 695 57. Yassour M, Vatanen T, Siljander H, Hamalainen AM, Harkonen T, Ryhanen SJ, Franzosa EA,  
696 Vlamakis H, Huttenhower C, Gevers D et al. Natural history of the infant gut microbiome and  
697 impact of antibiotic treatment on bacterial strain diversity and stability. *Sci Transl Med.* 2016;  
698 8(343):343ra381.
- 699 58. Chu DM, Antony KM, Ma J, Prince AL, Showalter L, Moller M, Aagaard KM. The early  
700 infant gut microbiome varies in association with a maternal high-fat diet. *Genome Med.*  
701 2016;8(1):77.
- 702 59. Reyes A, Blanton LV, Cao S, Zhao G, Manary M, Trehan I, Smith MI, Wang D, Virgin HW,  
703 Rohwer F et al. Gut DNA viromes of Malawian twins discordant for severe acute malnutrition.  
704 *Proc Natl Acad Sci U S A.* 2015; 112(38):11941-11946.
- 705 60. Beller L, Matthijssens J. What is (not) known about the dynamics of the human gut virome in  
706 health and disease. *Current opinion in virology.* 2019; 37:52-57.
- 707 61. Ma Y, You X, Mai G, Tokuyasu T, Liu C. A human gut phage catalog correlates the gut  
708 phageome with type 2 diabetes. *Microbiome.* 2018; 6(1):24.
- 709 62. Suttle CA. Marine viruses--major players in the global ecosystem. *Nat Rev Microbiol.* 2007;  
710 5(10):801-812.
- 711 63. Emerson JB, Roux S, Brum JR, Bolduc B, Woodcroft BJ, Jang HB, Singleton CM, Solden LM,  
712 Naas AE, Boyd JA et al. Host-linked soil viral ecology along a permafrost thaw gradient. *Nat*  
713 *Microbiol.* 2018; 3(8):870-880.
- 714 64. Ogilvie LA, Bowler LD, Caplin J, Dedi C, Diston D, Cheek E, Taylor H, Ebdon JE, Jones BV.  
715 Genome signature-based dissection of human gut metagenomes to extract subliminal viral  
716 sequences. *Nat Commun.* 2013; 4:2420.



- 717 65. Scarpellini E, Ianiro G, Attili F, Bassanelli C, De Santis A, Gasbarrini A. The human gut  
718 microbiota and virome: Potential therapeutic implications. *Dig Liver Dis.* 2015;  
719 47(12):1007-1012.
- 720 66. Foca A, Liberto MC, Quirino A, Marascio N, Zicca E, Pavia G. Gut inflammation and  
721 immunity: what is the role of the human gut virome? *Mediators Inflamm.* 2015; 2015:326032.
- 722 67. Guerin E, Shkoporov A, Stockdale SR, Clooney AG, Ryan FJ, Sutton TDS, Draper LA,  
723 Gonzalez-Tortuero E, Ross RP, Hill C. Biology and Taxonomy of crAss-like Bacteriophages,  
724 the Most Abundant Virus in the Human Gut. *Cell Host Microbe.* 2018; 24(5):653-664 e656.
- 725 68. Chen S, Zhou Y, Chen Y, Gu J. fastp: an ultra-fast all-in-one FASTQ preprocessor.  
726 *Bioinformatics.* 2018; 34(17):i884-i890.
- 727 69. Langmead B, Salzberg SL. Fast gapped-read alignment with Bowtie 2. *Nat Methods.* 2012;  
728 9(4):357-359.
- 729 70. Nurk S, Meleshko D, Korobeynikov A, Pevzner PA. metaSPAdes: a new versatile  
730 metagenomic assembler. *Genome Res.* 2017; 27(5):824-834.
- 731 71. Hyatt D, Chen GL, Locascio PF, Land ML, Larimer FW, Hauser LJ. Prodigal: prokaryotic  
732 gene recognition and translation initiation site identification. *BMC Bioinformatics.* 2010;  
733 11:119.
- 734 72. Buchfink B, Xie C, Huson DH. Fast and sensitive protein alignment using DIAMOND. *Nat*  
735 *Methods.* 2015; 12(1):59-60.
- 736 73. Ren J, Ahlgren NA, Lu YY, Fuhrman JA, Sun FZ. VirFinder: a novel k-mer based tool for  
737 identifying viral sequences from assembled metagenomic data. *Microbiome.* 2017; 5.
- 738 74. Apweiler R. Activities at the Universal Protein Resource (UniProt) (vol 42, pg D198, 2014).

- 739 Nucleic Acids Res. 2014; 42(11):7486-7486.
- 740 75. Schloissnig S, Arumugam M, Sunagawa S, Mitreva M, Tap J, Zhu A, Waller A, Mende DR,  
741 Kultima JR, Martin J et al. Genomic variation landscape of the human gut microbiome. Nature.  
742 2013; 493(7430):45-50.
- 743 76. Li W, Godzik A. Cd-hit: a fast program for clustering and comparing large sets of protein or  
744 nucleotide sequences. Bioinformatics. 2006; 22(13):1658-1659.
- 745 77. Jia B, Raphenya AR, Alcock B, Waglechner N, Guo P, Tsang KK, Lago BA, Dave BM, Pereira  
746 S, Sharma AN et al. CARD 2017: expansion and model-centric curation of the comprehensive  
747 antibiotic resistance database. Nucleic Acids Res. 2017; 45(D1):D566-D573.
- 748 78. Quast C, Pruesse E, Yilmaz P, Gerken J, Schweer T, Yarza P, Peplies J, Glockner FO. The  
749 SILVA ribosomal RNA gene database project: improved data processing and web-based tools.  
750 Nucleic Acids Res. 2013; 41(Database issue):D590-596.
- 751 79. Bushmanova E, Antipov D, Lapidus A, Prjibelski AD. rnaSPAdes: a de novo transcriptome  
752 assembler and its application to RNA-Seq data. Gigascience. 2019;8(9):giz100.
- 753 80. Starr EP, Nuccio EE, Pett-Ridge J, Banfield JF, Firestone MK. Metatranscriptomic  
754 reconstruction reveals RNA viruses with the potential to shape carbon cycling in soil. P Natl  
755 Acad Sci USA. 2019; 116(51):25900-25908.
- 756 81. Johnson LS, Eddy SR, Portugaly E. Hidden Markov model speed heuristic and iterative HMM  
757 search procedure. BMC Bioinformatics. 2010; 11.
- 758 82. Edgar RC. PILER-CR: Fast and accurate identification of CRISPR repeats. BMC  
759 Bioinformatics. 2007; 8.
- 760

761

762

763

764 **Table 1.** Characteristics of the subjects.

|                         | Adults    |           |                 | Children |           |                 |
|-------------------------|-----------|-----------|-----------------|----------|-----------|-----------------|
|                         | Chinese   | Pakistani | <i>P</i> -value | Chinese  | Pakistani | <i>P</i> -value |
| Number of subjects      | 24        | 24        |                 | 6        | 6         |                 |
| Sex, F/M                | 1/23      | 1/23      | 1.000           | 3/3      | 3/3       | 1.000           |
| Age, years              | 26.0±4.3  | 29.1±3.7  | 0.011           | 2.8±1.8  | 2.8±1.7   | 1.000           |
| Weight, kg              | 69.6±11.0 | 76.7±15.6 | 0.076           | 14±5.4   | 13.3±4.2  | 0.794           |
| BMI, kg/m <sup>2</sup>  | 22.8±2.8  | 25.6±4.5  | 0.011           | 16.0±2.0 | 17.4±3.1  | 0.396           |
| Drinking, %             | 50%       | 8.3%      | 0.003           | 0%       | 0%        | 1.000           |
| Smoking, %              | 16.7%     | 33.3%     | 0.030           | 0%       | 0%        | 1.000           |
| Antibiotics (≤2mons), % | 8.3%      | 8.3%      | 1.000           | 0%       | 0%        | 1.000           |
| Prebiotics (≤2mons), %  | 58.3%     | 41.7%     | 0.387           | 66.7%    | 50%       | 1.000           |
| Living in China, mons   |           | 11±4      |                 |          | 9±6       |                 |

765 The data for age, weight, and BMI were presented as mean ± sd. *P*-values for age, weight, and  
 766 BMI were calculated by Student's t-test, and for sex, drinking, smoking, antibiotics, and prebiotics  
 767 were calculated by Fisher's exact test.

768

769

770

771

772

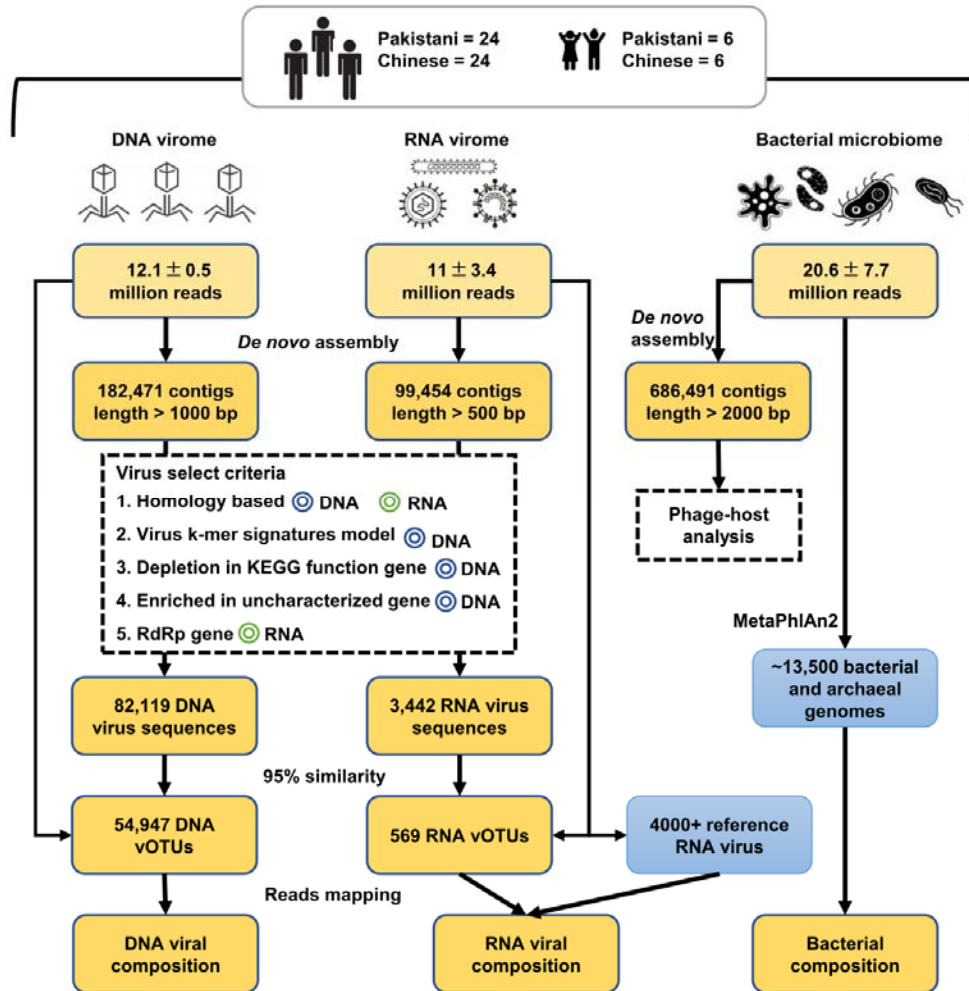

773  
774  
775  
776  
777

**Figure 1. Overview of the workflow for analyzing of DNA virome, RNA virome, and bacterial microbiome.**

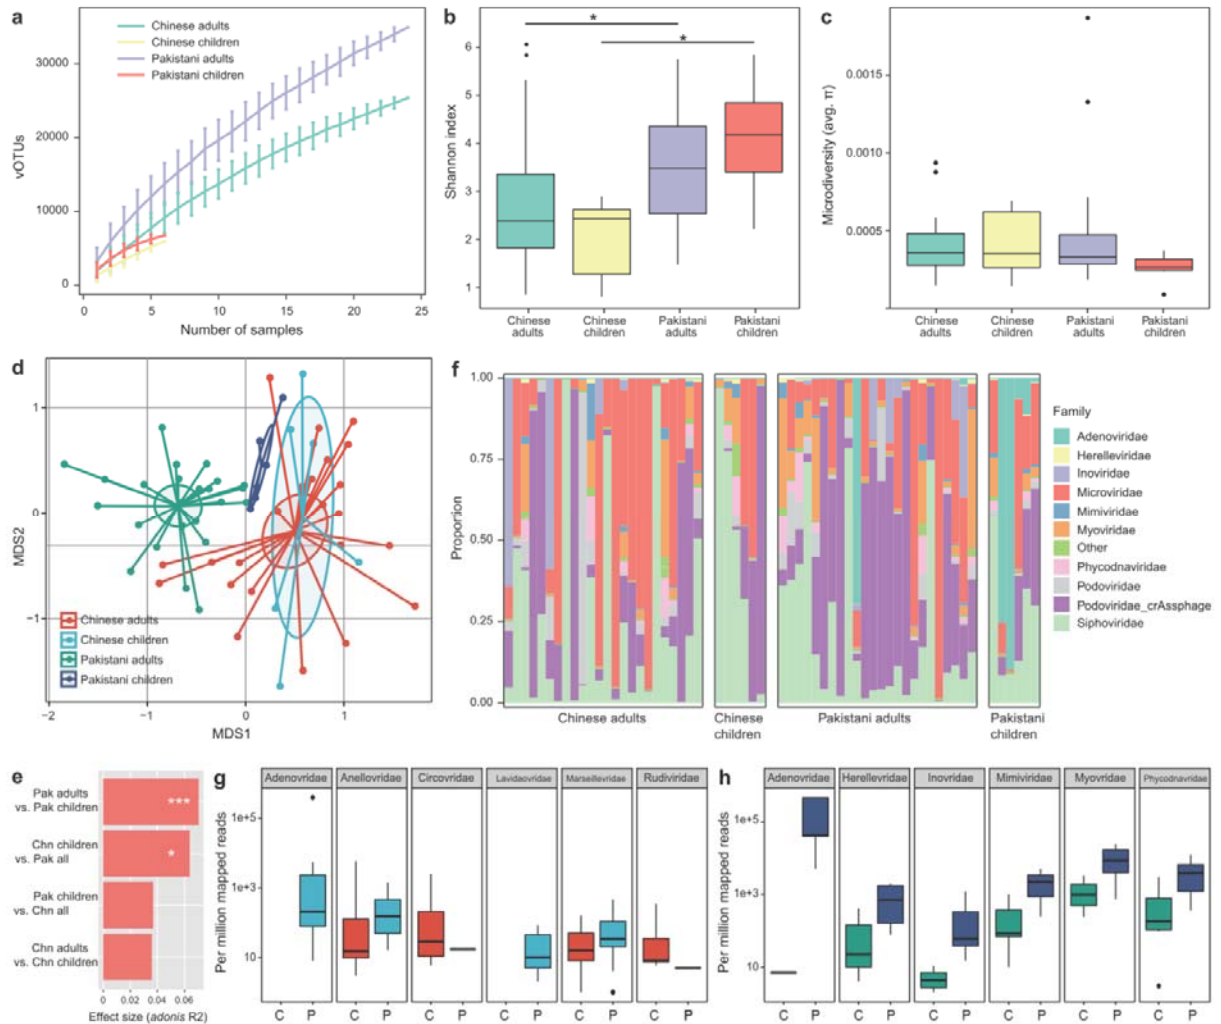

778

779 **Figure 2. Differences in gut DNA virome between Chinese and Pakistanis.** **a**, Rarefaction  
 780 curve analysis of number of vOTUs on each group of samples. The number of identified vOTUs  
 781 in different groups is calculated based on a randomly selected specific number of samples with 30  
 782 replacements, and the median and quartiles numbers are plotted. **b-c**, Boxplot shows the  
 783 macrodiversity (**b**) and microdiversity (**c**) that differ among four groups. The significance level in  
 784 the Student's t test is denoted as: \*,  $q < 0.05$ ; \*\*,  $q < 0.01$ . **d**, NMDS analysis based on the  
 785 composition of virome, revealing the separations between different groups. The location of  
 786 samples (represented by nodes) in the first two multidimensional scales are shown. Lines connect  
 787 samples in the same group, and circles cover samples near the center of gravity for each group. **e**,  
 788 PERMANOVA analysis reveals that the virome of Pakistani children are similar with the Chinese  
 789 subjects ( $adonis\ p > 0.05$ ). The effect sizes and  $p$ -values of the  $adonis$  analysis are shown. **f**,  
 790 Composition of gut virome at the family level. **g-h**, Boxplot shows the differential viral families of  
 791 adults (**g**) and children (**h**) when compared between Chinese and Pakistanis. C, Chinese  
 792 individuals; P, Pakistani individuals. For boxplot, boxes represent the interquartile range between  
 793 the first and third quartiles and median (internal line); whiskers denote the lowest and highest  
 794 values within 1.5 times the range of the first and third quartiles, respectively; and nodes represent  
 795 outliers beyond the whiskers.

796

797

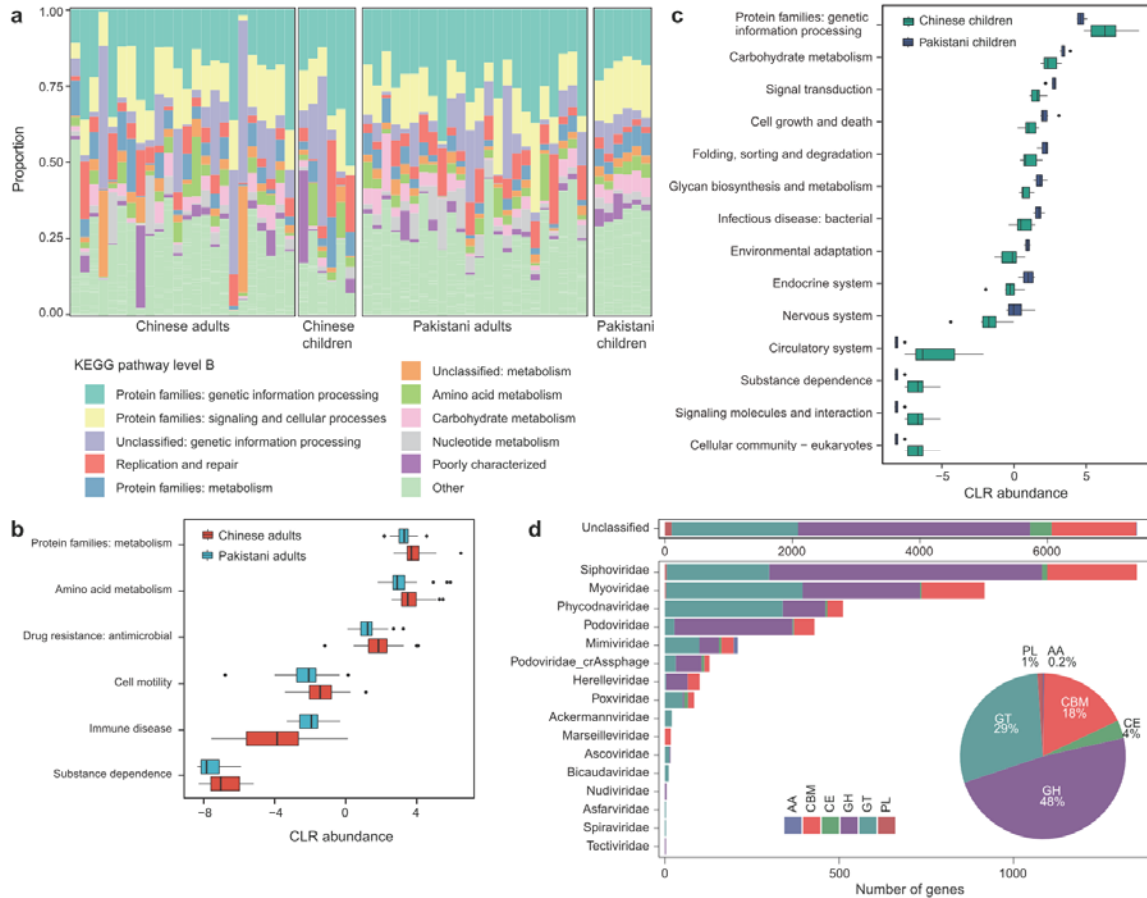

798

799

**Figure 3. Comparison of DNA viral functions between Chinese and Pakistanis. a,**

800

Composition of viral functional categories at the KEGG pathway level B. **b-c,** Boxplot shows the

801

KEGG pathways that differed in abundance between Chinese adults and Pakistani adults (**b**) and

802

between Chinese children and Pakistani children (**c**). Boxes represent the interquartile range

803

between the first and third quartiles and median (internal line); whiskers denote the lowest and

804

highest values within 1.5 times the range of the first and third quartiles, respectively; and nodes

805

represent outliers beyond the whiskers. **d,** The taxonomic distribution of CAZymes. GH, glycoside

806

hydrolase; GT glycosyl transferase; CBM, carbohydrate binding; CE, carbohydrate esterase; PL,

807

polysaccharide lyase; AA auxiliary activity.

808

809

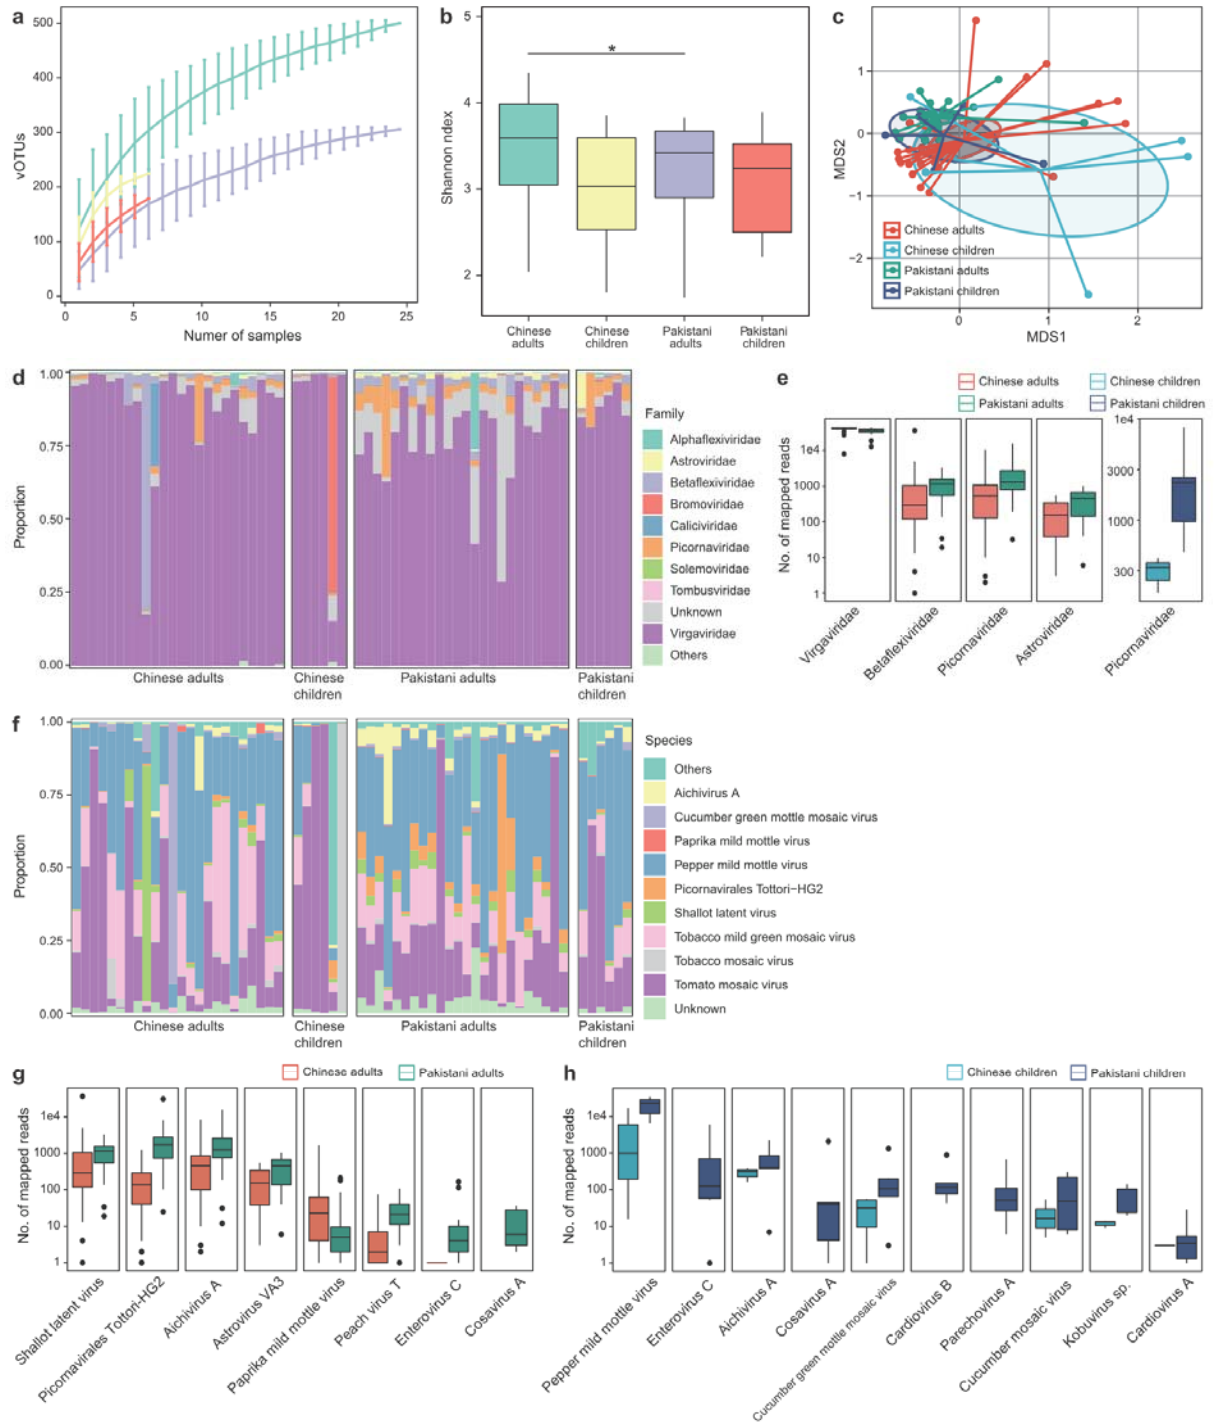

810

811 **Figure 4. Differences in gut RNA virome between Chinese and Pakistanis.** **a**, Rarefaction  
 812 curve analysis of number of vOTUs on each group of samples. The number of identified vOTUs  
 813 in different groups is calculated based on a randomly selected specific number of samples with 30  
 814 replacements, and the median and quartiles numbers are plotted. **b**, Boxplot shows the Shannon  
 815 diversity index among four groups. The significance level in the Student's t test is denoted as: \*,  
 816  $q < 0.05$ ; \*\*,  $q < 0.01$ . **c**, NMDS analysis based on the composition of virome, revealing the  
 817 separations between different groups. The location of samples (represented by nodes) in the first

818 two multidimensional scales are shown. Lines connect samples in the same group, and circles  
 819 cover samples near the center of gravity for each group. **d**, Composition of gut virome at the  
 820 family level. **e**, Boxplot shows the differential viral families between Chinese and Pakistanis. **f**,  
 821 Composition of gut virome at the species level. **g-h**, Boxplot shows the differential viral families  
 822 of adults (**g**) and children (**h**) when compared between Chinese and Pakistanis. For boxplot, boxes  
 823 represent the interquartile range between the first and third quartiles and median (internal line);  
 824 whiskers denote the lowest and highest values within 1.5 times the range of the first and third  
 825 quartiles, respectively; and nodes represent outliers beyond the whiskers.

826

827

828

829

830

831

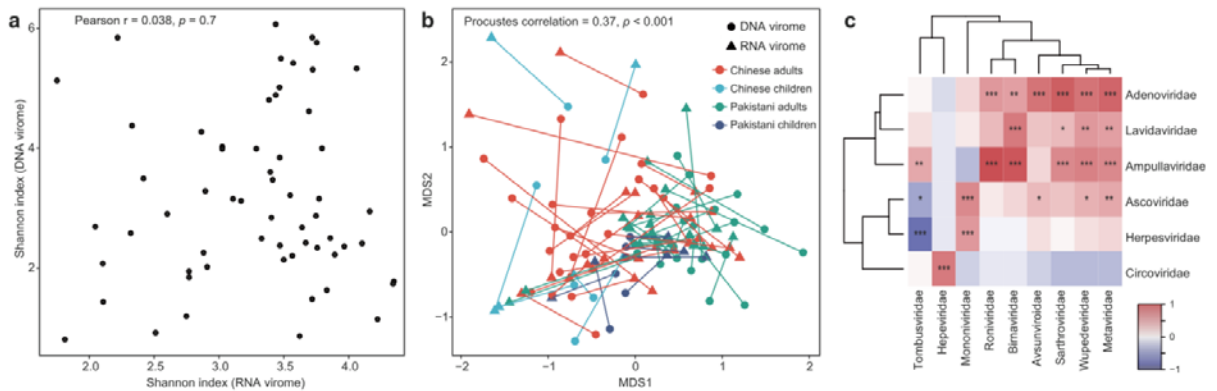

832

833 **Figure 5. Correlations between DNA and RNA viromes.** **a**, Relationship of microdiversity  
 834 between DNA and RNA virome. **b**, Procrustes analysis of DNA virome versus RNA viromes.  
 835 Samples for DNA and RNA viromes are shown as circles and blue triangles, respectively; and  
 836 samples from the same individual are connected by lines. Colors represent samples belong to  
 837 different groups. **c**, Heatmap shows the co-abundance correlations between DNA and RNA viral  
 838 families. The significance level in the Spearman correlation test is denoted as: \*,  $q < 0.05$ ; \*\*,   
 839  $q < 0.01$ ; \*\*\*,  $q < 0.001$ .

840

841

842



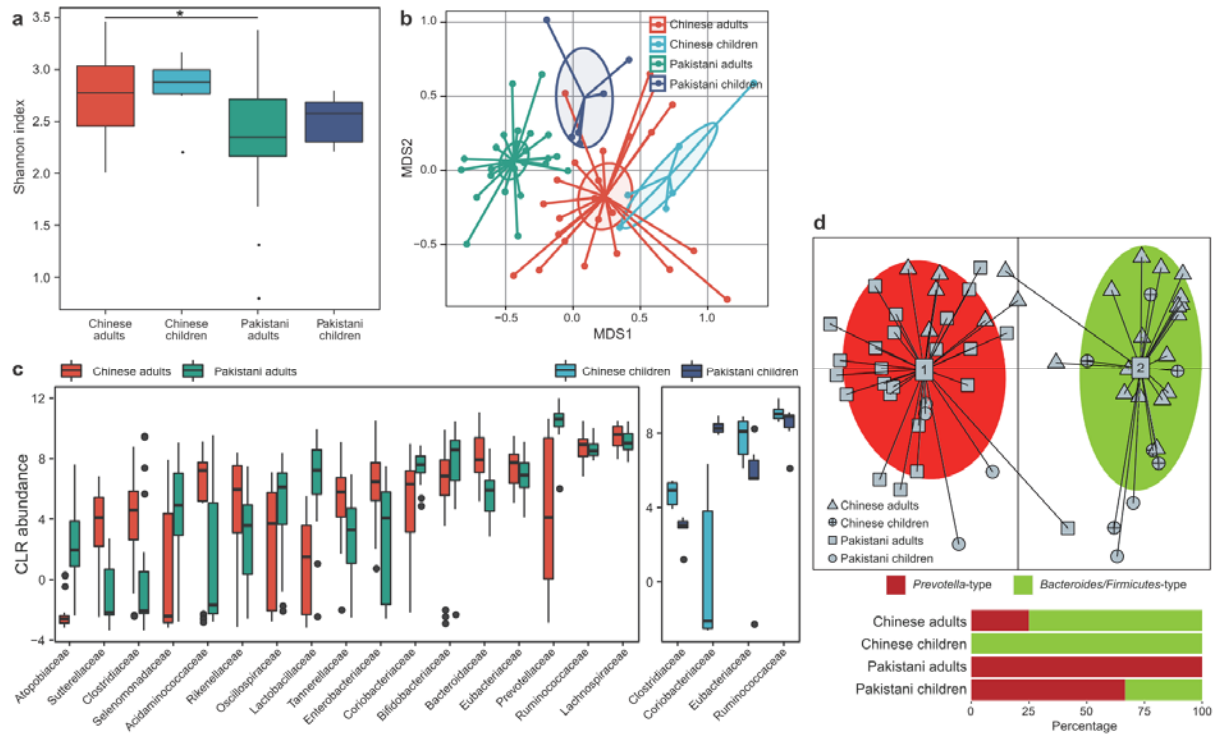

843

844 **Figure 6. Differences in gut bacterial microbiome between Chinese and Pakistanis. a,**

845 Boxplot shows the Shannon diversity index among four groups. The significance level in the

846 Student's t test is denoted as: \*,  $q < 0.05$ ; \*\*,  $q < 0.01$ . **d**, NMDS analysis based on the composition

847 of bacterial microbiome, revealing the separations between different groups. The location of

848 samples (represented by nodes) in the first two multidimensional scales are shown. Lines connect

849 samples in the same group, and circles cover samples near the center of gravity for each group. **c**,

850 Boxplot shows the bacterial families that differed in abundance between two cohorts. Boxes

851 represent the interquartile range between the first and third quartiles and median (internal line);

852 whiskers denote the lowest and highest values within 1.5 times the range of the first and third

853 quartiles, respectively; and nodes represent outliers beyond the whiskers. **d**, Enterotype analysis of

854 bacterial microbiome samples. The upper panel show the principal component analysis (PCA) of

855 all samples, revealing the separation between two enterotypes. The lower panel show the

856 composition of enterotypes in four groups.

857

858

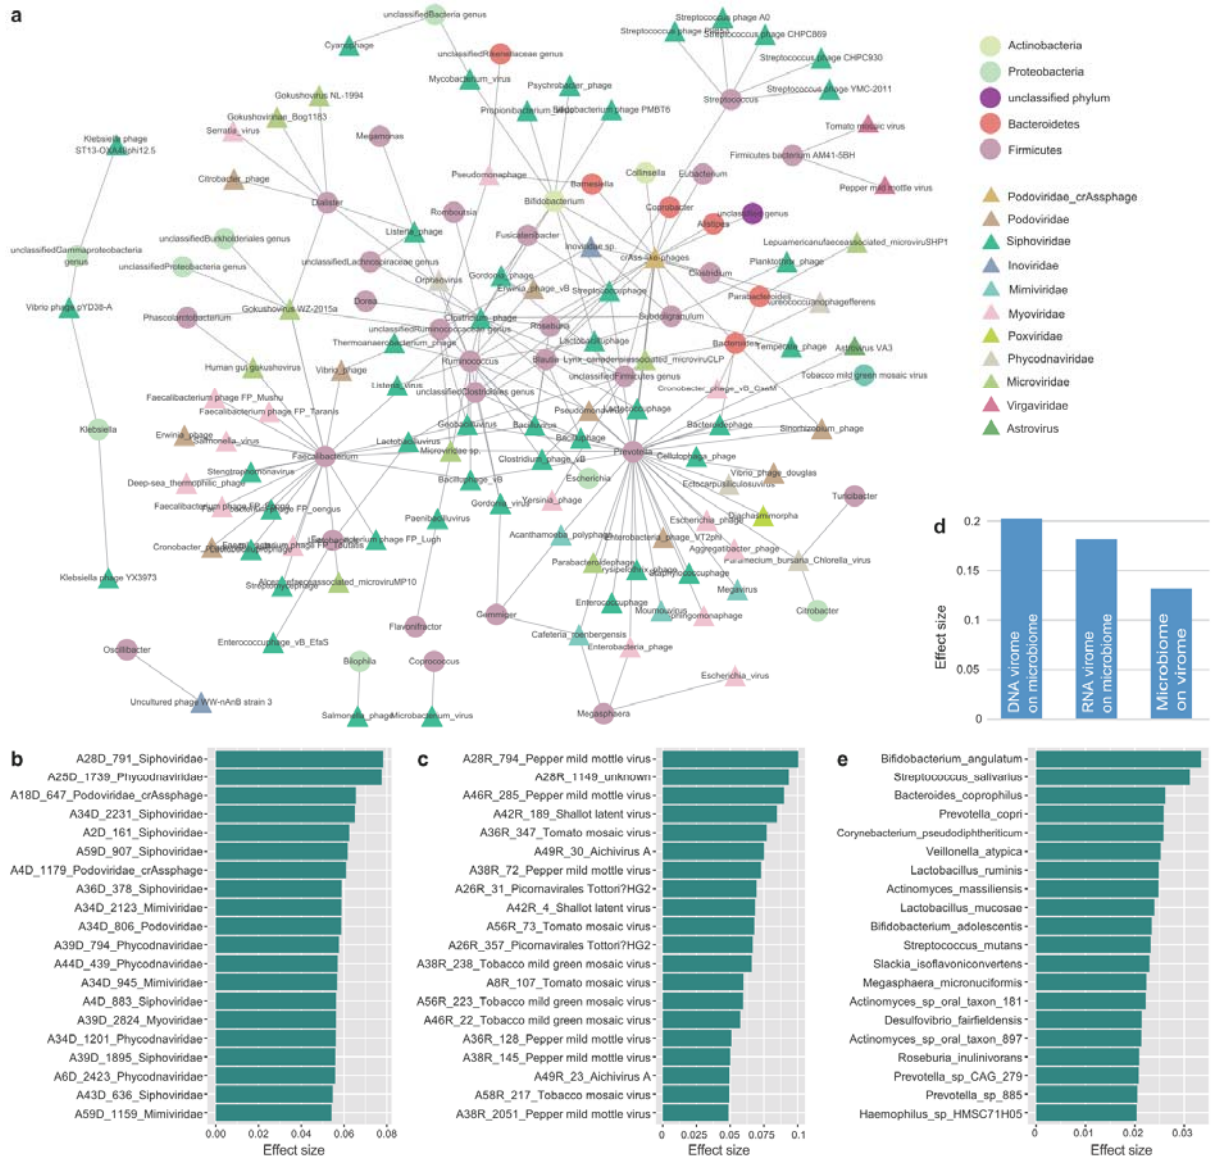

859

860

861

862

863

864

865

866

867

868

869

870

871

**Figure 7. Associations between virome and bacterial microbiome.** **a**, Host range of viruses predicted through CRISPR spacer matches. Circles and triangles represent the bacteria and viruses, respectively; and the colors represent their taxonomic assignment at the phylum (for bacteria) or family (for viruses) levels. **b-c**, The 20 DNA (**b**) and RNA families (**c**) for which the highest effect size that significant impact the bacterial microbiome communities. **d**, The combined effect size of viruses on bacterial microbiome as well as bacteria on virome. To calculate the combined effect size, a set of non-redundant covariates (DNA vOTUs, RNA vOTUs, or bacterial species) is selected from the omic datasets, and then the accumulated effect size is calculated by *adonis* analysis using these selected covariates. **e**, The 20 bacterial species with highest effect size for impacting the viral communities.

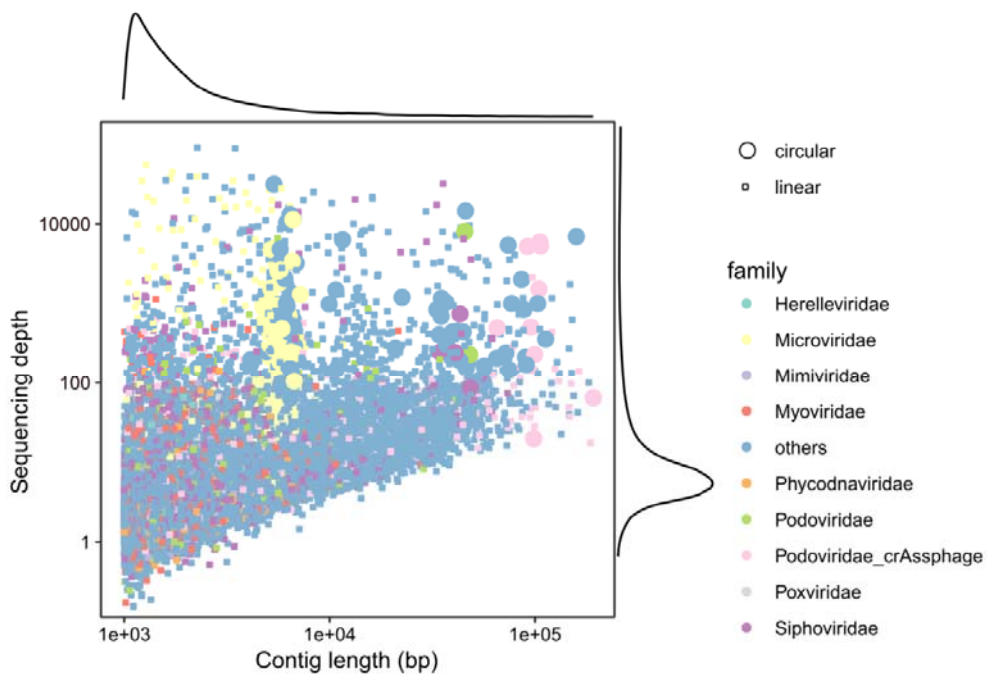

872

873 **Supplementary figure 1. Distribution of DNA viral contigs by length and depth of coverage.**

874

875

876
